# Supplementary material for: Nutritional Management of Oncological Symptoms: A Comprehensive Review
Source: MDPI journal article supplement (doi:10.3390/nu15245068), 2023-12-11

## **Luce Fluida (sunshine in a plate) (mechanic dysphagia)**

Preparation and servings for two people

### **For the mango and yellow tomato soup:**

#### Ingredients:

- Ripe mango 60 g
- Yellow grape tomatoes 150 g
- Water 20 g
- Salt 1 g
- Extra virgin olive oil 15 g

#### Procedure:

- Blend the yellow grape tomatoes together with cold water and the ripe mango.
- Pass the mixture through a fine sieve and emulsify it with salt and extra virgin olive oil using an immersion blender.

### **For the yellow tomato mousse:**

#### Ingredients:

- Yellow grape tomatoes 180 g
- Unsweetened plain soy milk 50 g
- Salt 1 g
- Dulcita brown sugar 0.5 g

#### Procedure:

- Blend and sieve the yellow grape tomatoes to obtain a puree.
- Emulsify the puree with the soy milk, salt and brown sugar, by using an immersion blender.
- Add tomato emulsion to a siphon and load with a charge for cream. Refrigerate for at least 4 h.

---

### **For the beet mousse:**

#### Ingredients:

- Fresh beets 300 g
- Red grape tomatoes 150 g
- Salt 1 g
- Dulcita brown sugar 0.5 g

#### Procedure:

- Wash the beets and centrifuge them to obtain a juice
- Blend and sieve the red grape tomatoes and combine with the beet juice
- Blend the mixture with salt and brown sugar
- Add beet mixture to a siphon and load with a charge for cream. Refrigerate for at least 4 h

### **For the pistachio and basil sauce:**

#### Ingredients:

- Pistachios, unshelled 100 g
- Water 150 g
- Salt 1 gr
- Extra virgin olive oil 50 g
- Cold-pressed corn oil 150 g
- Fresh basil 15 g
- Lemon juice 3 g

#### Procedure:

- Blanch the pistachios in boiling water for 3 min then drain and let cool.
- Peel pistachios and blend with water, salt and extra virgin olive oil.
- Once smooth, add the lemon juice.

### **For the red shrimp cream:**

#### Ingredients:

- Red shrimp 150 g
- Unsweetened plain soy milk 50 g
- Extra virgin olive oil 10 g
- Water 10 g
- Salt 0.5 g

---

### Procedure:

- Clean the shrimp and freeze or blast chill at -20°C for at least 24 h.
- Blend them with the soy milk, water, extra virgin olive oil and salt, until smooth.

### **For the black olive sauce:**

#### Ingredients:

- Black olive paté 70 g
- Water 40 g

#### Procedure:

- Blend the black olive paté with water, until emulsified.

### **Plating:**

- Add two spoonfuls of mango and tomato soup to a soup bowl, then add three teaspoons of pistachio sauce spaced out across the bowl, using a spoon or pastry bag. Top with three mounds of red shrimp cream from the siphon. Also decorate with black olive sauce.
- Complete the dish by adding the beet and the tomato mousses and a drizzle of extra virgin olive oil.

|                                |      |
|--------------------------------|------|
| Calories, Kcal                 | 1618 |
| Proteins, g                    | 25   |
| Fats, g                        | 154  |
| Saturated fatty acids, g       | 21   |
| Monounsaturated fatty acids, g | 77   |
| Polyunsaturated fatty acids, g | 48   |
| Carbohydrates, g               | 26   |
| Sugars, g                      | 24   |
| Fiber, g                       | 14   |

*Caloric and macronutrients label (for 1 serving)*

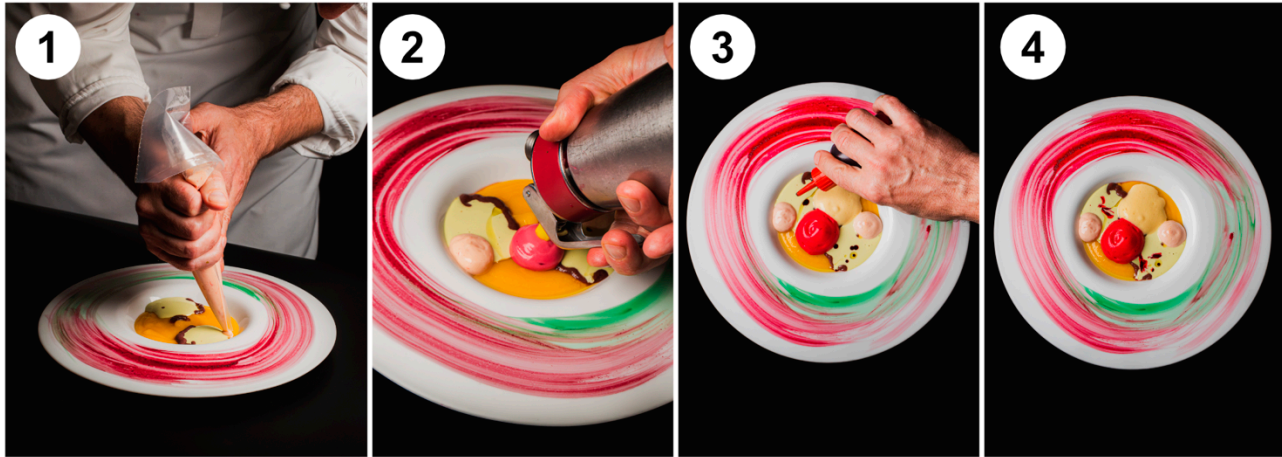

## Legumi e legami (bean and scallop soup) (constipation)

Preparation and servings for two people

### For the legume and seaweed soup:

#### Ingredients:

- Fresh Cannellini beans 150 g
- Fresh Borlotti beans 150 g
- White onion 40 g (half of a small white onion)
- 1 bay leaf
- Fresh broad beans 300 g
- Chopped mixed seaweed (kombu, wakame, sea lettuce, Irish moss) 50 g
- Extra virgin olive oil 50 g
- Salt

#### Procedure:

Add fresh Cannellini and Borlotti beans to a saucepan together with the onion and bay leaf. Cover with cold water and bring to a simmer.

- **Note:** dried beans can be used, as well, providing they have been soaked until they triple their initial dry weight.
- Once the beans are cooked, blend 3/4 of them with a little cooking water to make a smooth cream (if needed, further dilute it with water or broth) and add salt and extra virgin olive oil to taste.  
**Note:** to further enrich the flavour, other legumes like blanched fava beans, chick peas, lentils, peas or red soybeans can be added.
- Dress the cream with the chopped mixed seaweed, previously blanched or rehydrated (if dried seaweed is used).

### For the scallops:

---

### Ingredients:

- Scallops 4 pieces
- Extra virgin olive oil 15 g
- Umeboshi 10 g
- Ponzu 5 g
- Dried seaweed flakes 3 g
- Salt

### Procedure:

- Carefully clean the scallops.
- Add salt and extra virgin olive oil to taste and grill the scallops on both sides.
- Dress them with extra virgin olive oil, umeboshi puree, ponzu and dried seaweed flakes.

## **For the fried onion or leek:**

### Ingredients:

- 00 flour 35 g
- Cornstarch 15 g
- Sparkling water 45 g
- Ice cubes
- Onion/leek rings 30 g

### Procedure:

- Make a light tempura with sparkling water, ice cubes, 00 flour and cornstarch.  
**Note:** The tempura batter should be kept very cold, ice cubes could also be placed at the bottom of a bowl in contact with the tempura.
- Dip the onion/leek rings in the tempura and fry them in olive oil at 175°C.
- Drain the rings, using paper towels to absorb the excess fat and add a small pinch of salt.

## **Plating:**

- Pour two ladles of the legume and seaweed soup in a bowl and mix it with the remaining legumes (kept as a whole).
- Place two grilled scallops on top of the soup.
- Complete the dish with the dried seaweed flakes, fried onion/leek rings and a drizzle of extra virgin olive oil.

|                |     |
|----------------|-----|
| Calories, Kcal | 694 |
| Proteins, g    | 26  |

---

|                                |    |
|--------------------------------|----|
| Fats, g                        | 34 |
| Saturated fatty acids, g       | 5  |
| Monounsaturated fatty acids, g | 24 |
| Polyunsaturated fatty acids, g | 3  |
| Charbohydrates, g              | 60 |
| Sugars, g                      | 6  |
| Fiber, g                       | 29 |

*Caloric and macronutrients label (for 1 serving)*

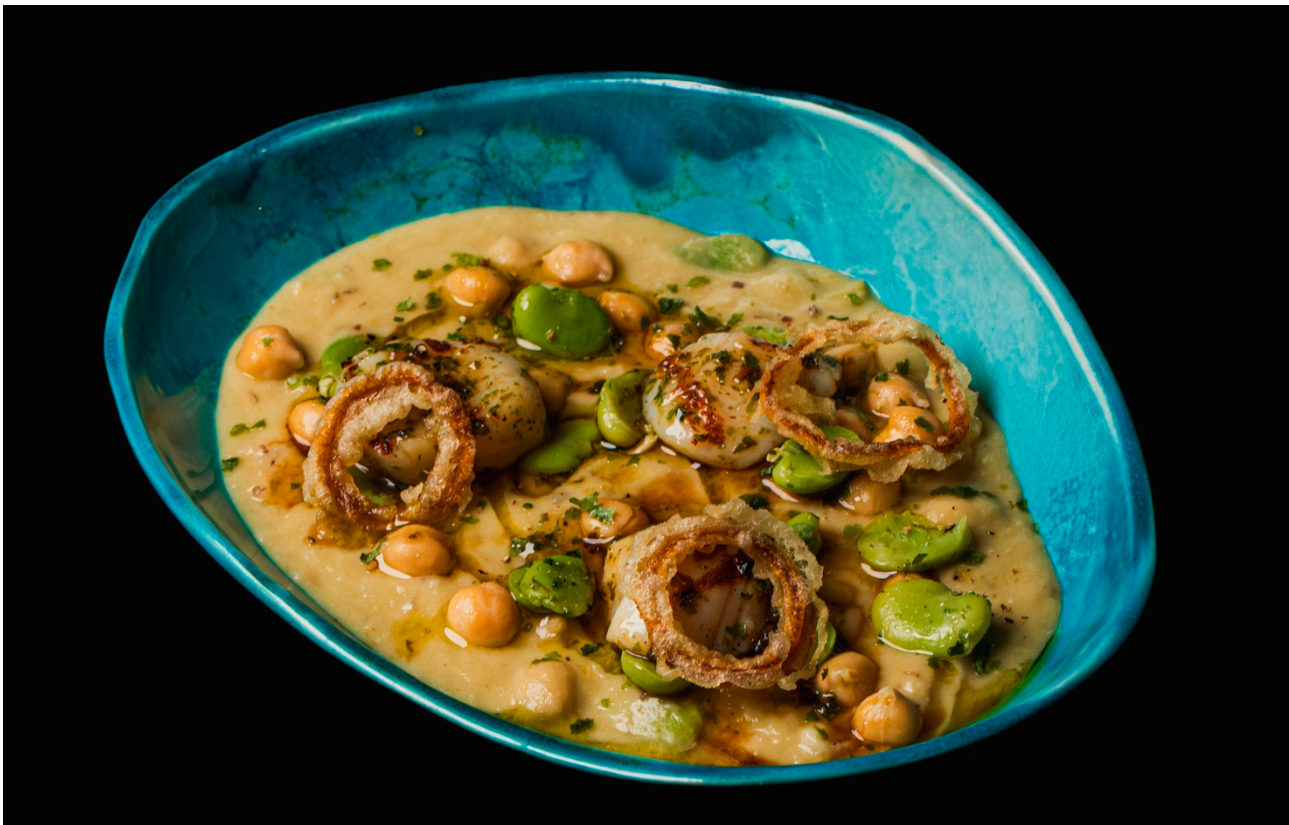

Supplement: s1 [file s1]
